# Supplementary material for: The socioeconomic gap in life expectancy in Germany: a decomposition of age- and cause-specific mortality contributions, 2003–2021
Source: bioRxiv or medRxiv preprint supplement (doi:10.1101/2023.12.08.23299713), 2023-12-11

## Supplemental Material

### The socioeconomic gap in life expectancy in Germany: a decomposition of age- and cause-specific mortality contributions, 2003–2021

Tetzlaff F<sup>1\*</sup>, Sauerberg M<sup>2</sup>, Grigoriev P<sup>2</sup>, Tetzlaff J<sup>3</sup>, Mühlichen M<sup>2</sup>, Baumert J<sup>4</sup>, Michalski N<sup>1</sup>, Wengler A<sup>5</sup>, Enno Nowossadeck<sup>1</sup>, Hoebel J<sup>1</sup>

<sup>1</sup> Division of Social Determinants of Health, Department of Epidemiology and Health Monitoring, Robert Koch Institute, Berlin, Germany

<sup>2</sup> Research Area of Ageing, Mortality and Population Dynamics, Federal Institute for Population Research (BiB), Wiesbaden, Germany

<sup>3</sup> Medical Sociology Unit, Hannover Medical School, Hannover, Germany

<sup>4</sup> Division of Physical Health, Department of Epidemiology and Health Monitoring, Robert Koch Institute, Berlin, Germany

<sup>5</sup> Division of Health Reporting, Department of Epidemiology and Health Monitoring, Robert Koch Institute, Berlin, Germany

#### \*Corresponding author

Dr. Fabian Tetzlaff  
Robert Koch Institute  
Division of Social Determinants of Health  
Nordufer 20  
13302 Berlin  
Germany  
TetzlaffF@rki.de

**Tab. S1 Cause-of-death Classification**

| #  | Detailed category                             | ICD-10                                                                        | Grouped category                            |
|----|-----------------------------------------------|-------------------------------------------------------------------------------|---------------------------------------------|
| 1  | Infectious disease                            | A00-B99                                                                       | Other causes (7)                            |
| 2  | Lung cancer*                                  | C33-C34                                                                       | Cancer (1)                                  |
| 3  | Preventable neoplasm                          | C00-C14, C15-C16, C22, C32                                                    | Cancer (1)                                  |
| 4  | Treatable neoplasm**                          | C18-C21, C40-C41, C43-C44, C50, C53-C55, C61-C62, C67, C69, C73, C81, D10-D36 | Cancer (1)                                  |
| 5  | Other neoplasm                                | Residual C codes, D00-D09, D37-D48                                            | Cancer (1)                                  |
| 6  | Diabetes                                      | E10-E14                                                                       | Other causes (7)                            |
| 7  | Dementia and Alzheimer's                      | F01, F03, G30                                                                 | Mental, behavioural or nervous disorder (2) |
| 8  | Alcohol and drug-related                      | F10-F19                                                                       | Mental, behavioural or nervous disorder (2) |
| 9  | Other mental, behavioural or nervous disorder | Residual F-G codes                                                            | Mental, behavioural or nervous disorder (2) |
| 10 | Ischaemic heart disease                       | I20-I25                                                                       | Cardiovascular diseases (3)                 |
| 11 | Cerebrovascular disease                       | I60-I69                                                                       | Cardiovascular diseases (3)                 |
| 12 | Other circulatory disease                     | Residual I codes                                                              | Cardiovascular diseases (3)                 |
| 13 | Influenza and pneumonia                       | J09-J22                                                                       | Respiratory diseases (4)                    |
| 14 | COPD                                          | J41-J44                                                                       | Respiratory diseases (4)                    |
| 15 | Other respiratory disease                     | Residual J codes                                                              | Respiratory diseases (4)                    |
| 16 | Liver disease                                 | K70-K77                                                                       | Digestive diseases (5)                      |
| 17 | Other digestive disease                       | K00-K69, K80-K99                                                              | Digestive diseases (5)                      |
| 18 | Covid-19                                      | U07                                                                           | Other causes (7)                            |
| 19 | Traffic accidents                             | V01-V99                                                                       | External causes (6)                         |
| 20 | Suicide                                       | X60-X84                                                                       | External causes (6)                         |
| 21 | Other accidents                               | W00-W99, X00-X59, Y35-Y98                                                     | External causes (6)                         |
| 22 | Residual causes***                            | Residual D-E codes; all H, L, M, N, O, P, Q codes                             | Other causes (7)                            |

\* Lung cancer is also preventable but due to its significance and divergent trends among men and women, it should be studied separately.

\*\* Sex-specific cancers (breast, uterus, cervix uteri, prostate, testis) included; leukaemia (C91-C95) not included because widely amenable only at ages below 45

\*\*\* Many infant deaths (P00-P96, Q00-Q99) included in residual group, not separately. If we should ever consider analysing trends in infant mortality, it would probably make more sense to just look at mortality below age 1 instead of selected causes.

Fig.S1 Time trends in age-standardised mortality in men by regional socioeconomic deprivation, 2003-2021

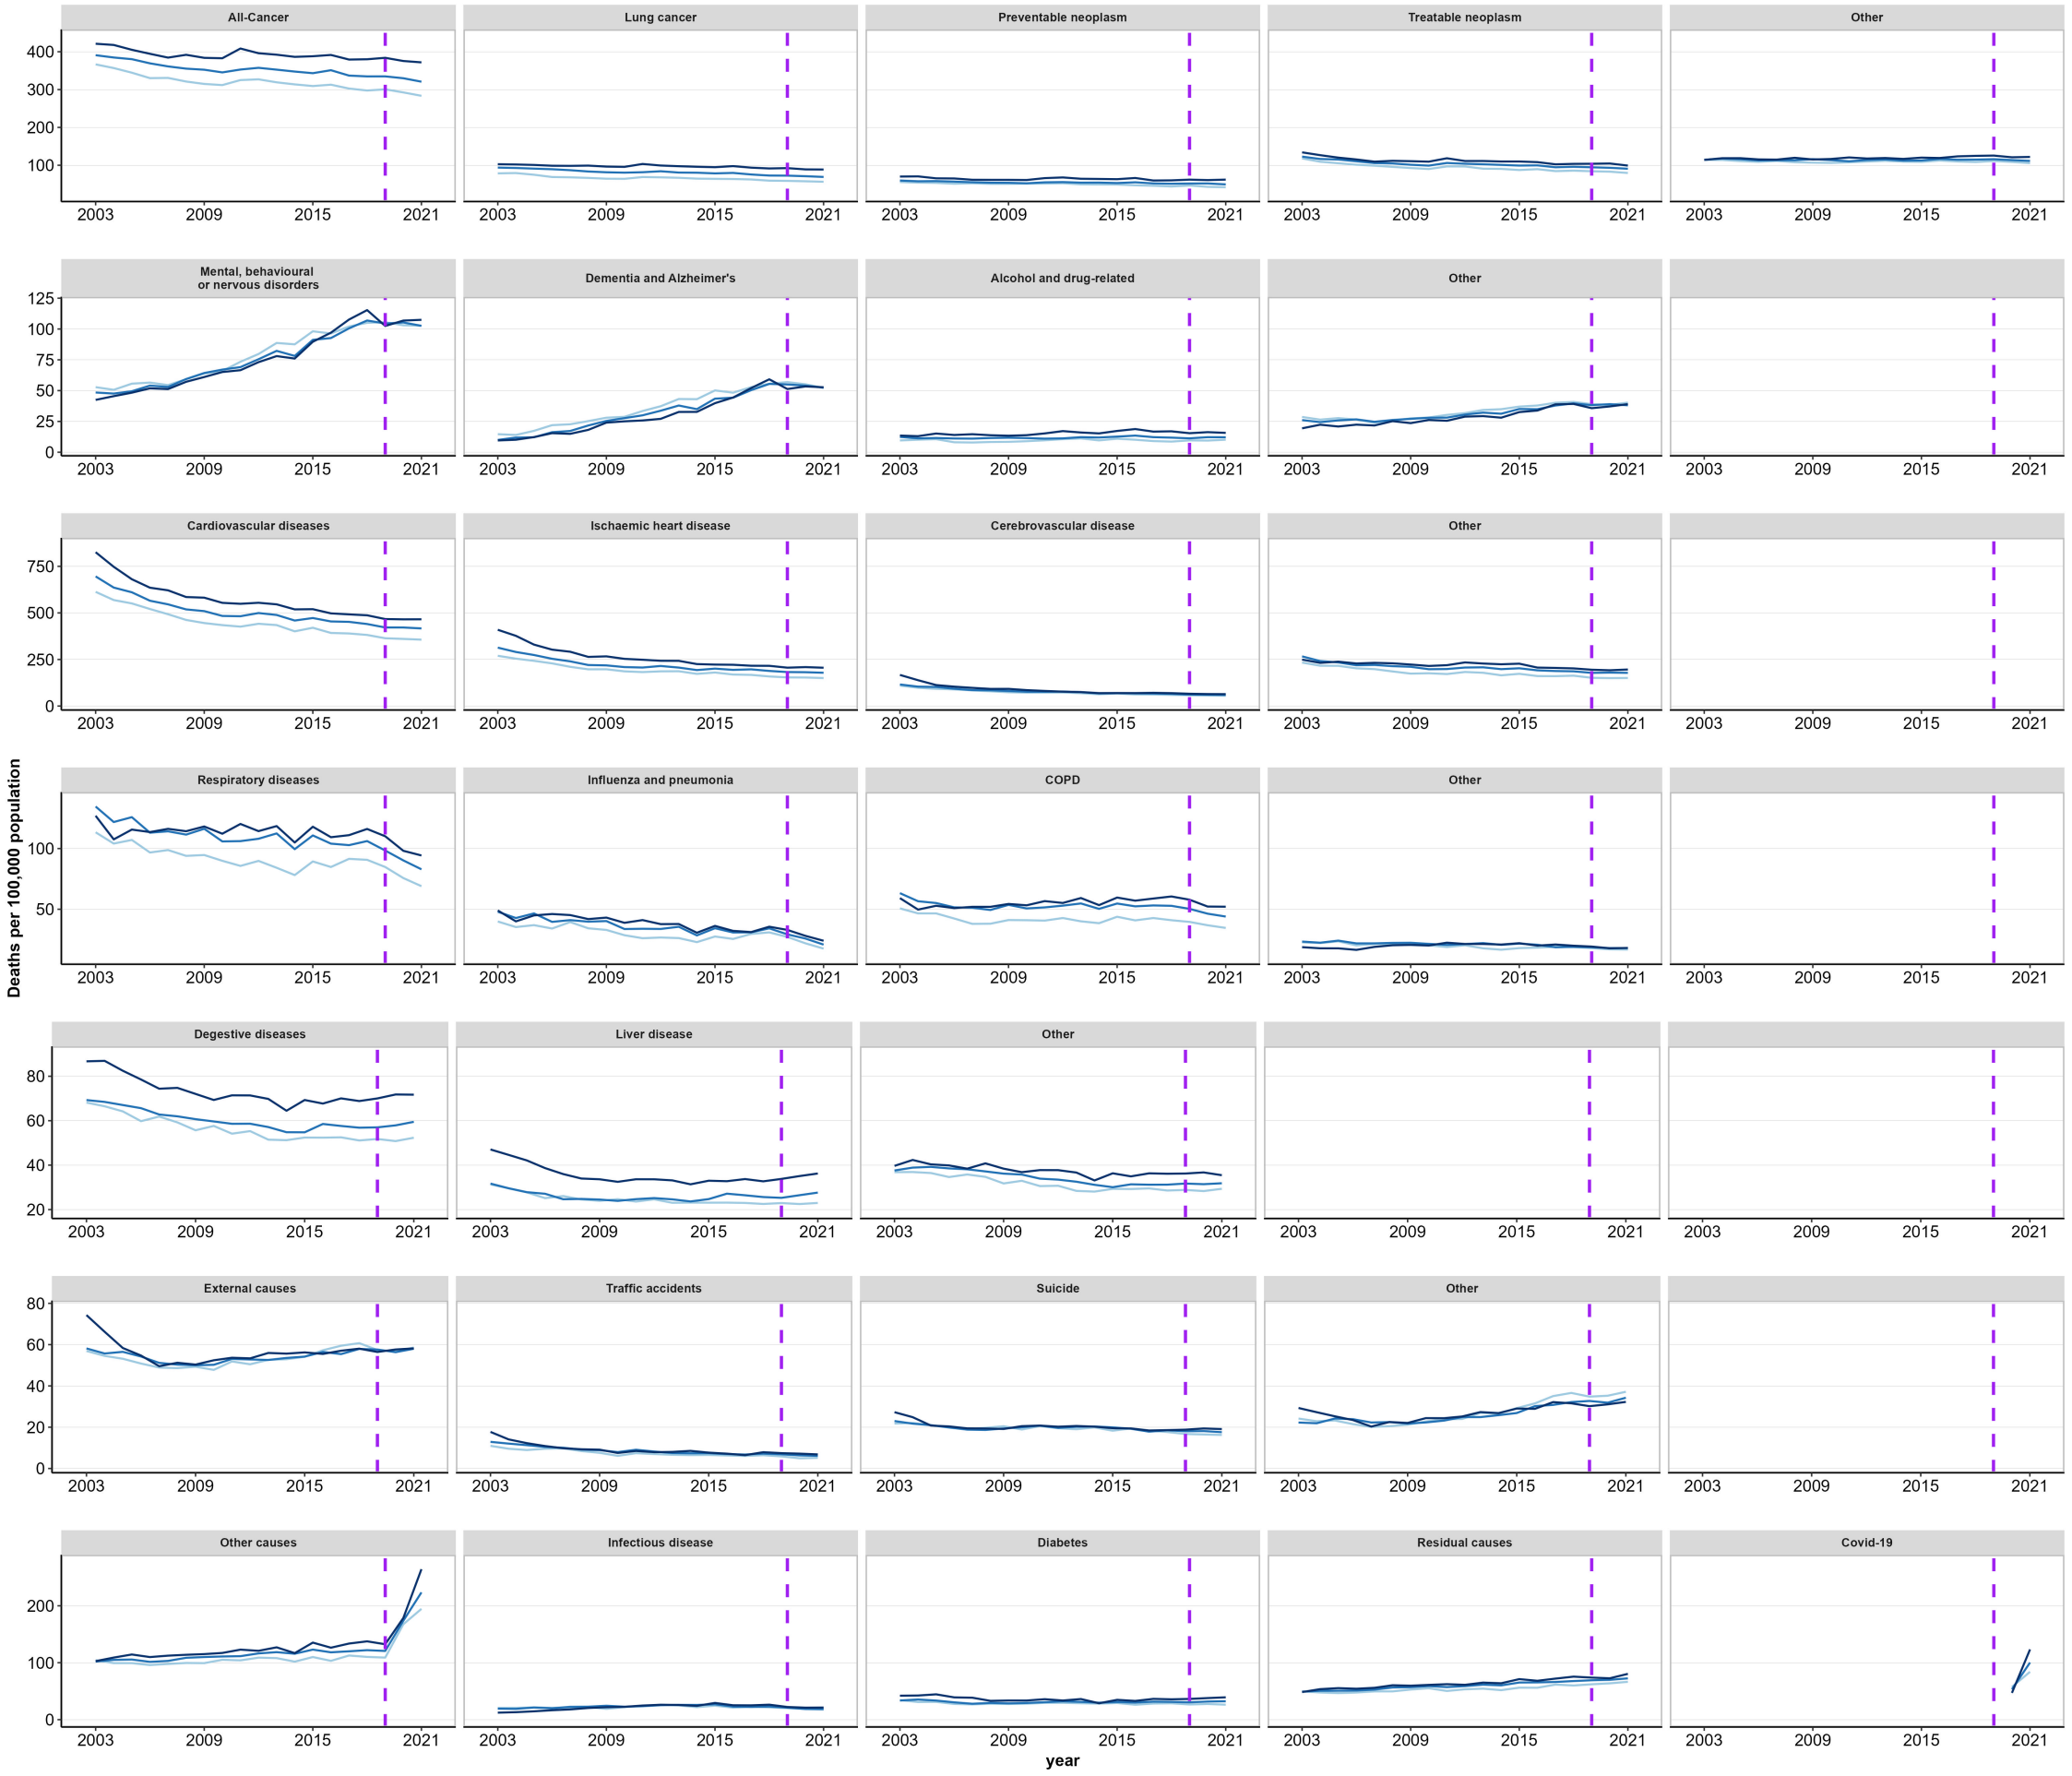

Socioeconomic deprivation (GISD) — low (quintile 1) — middle (quintiles 2-4) — high (quintile 5)

Fig.S2 Time trends in age-standardised mortality in women by regional socioeconomic deprivation, 2003-2021

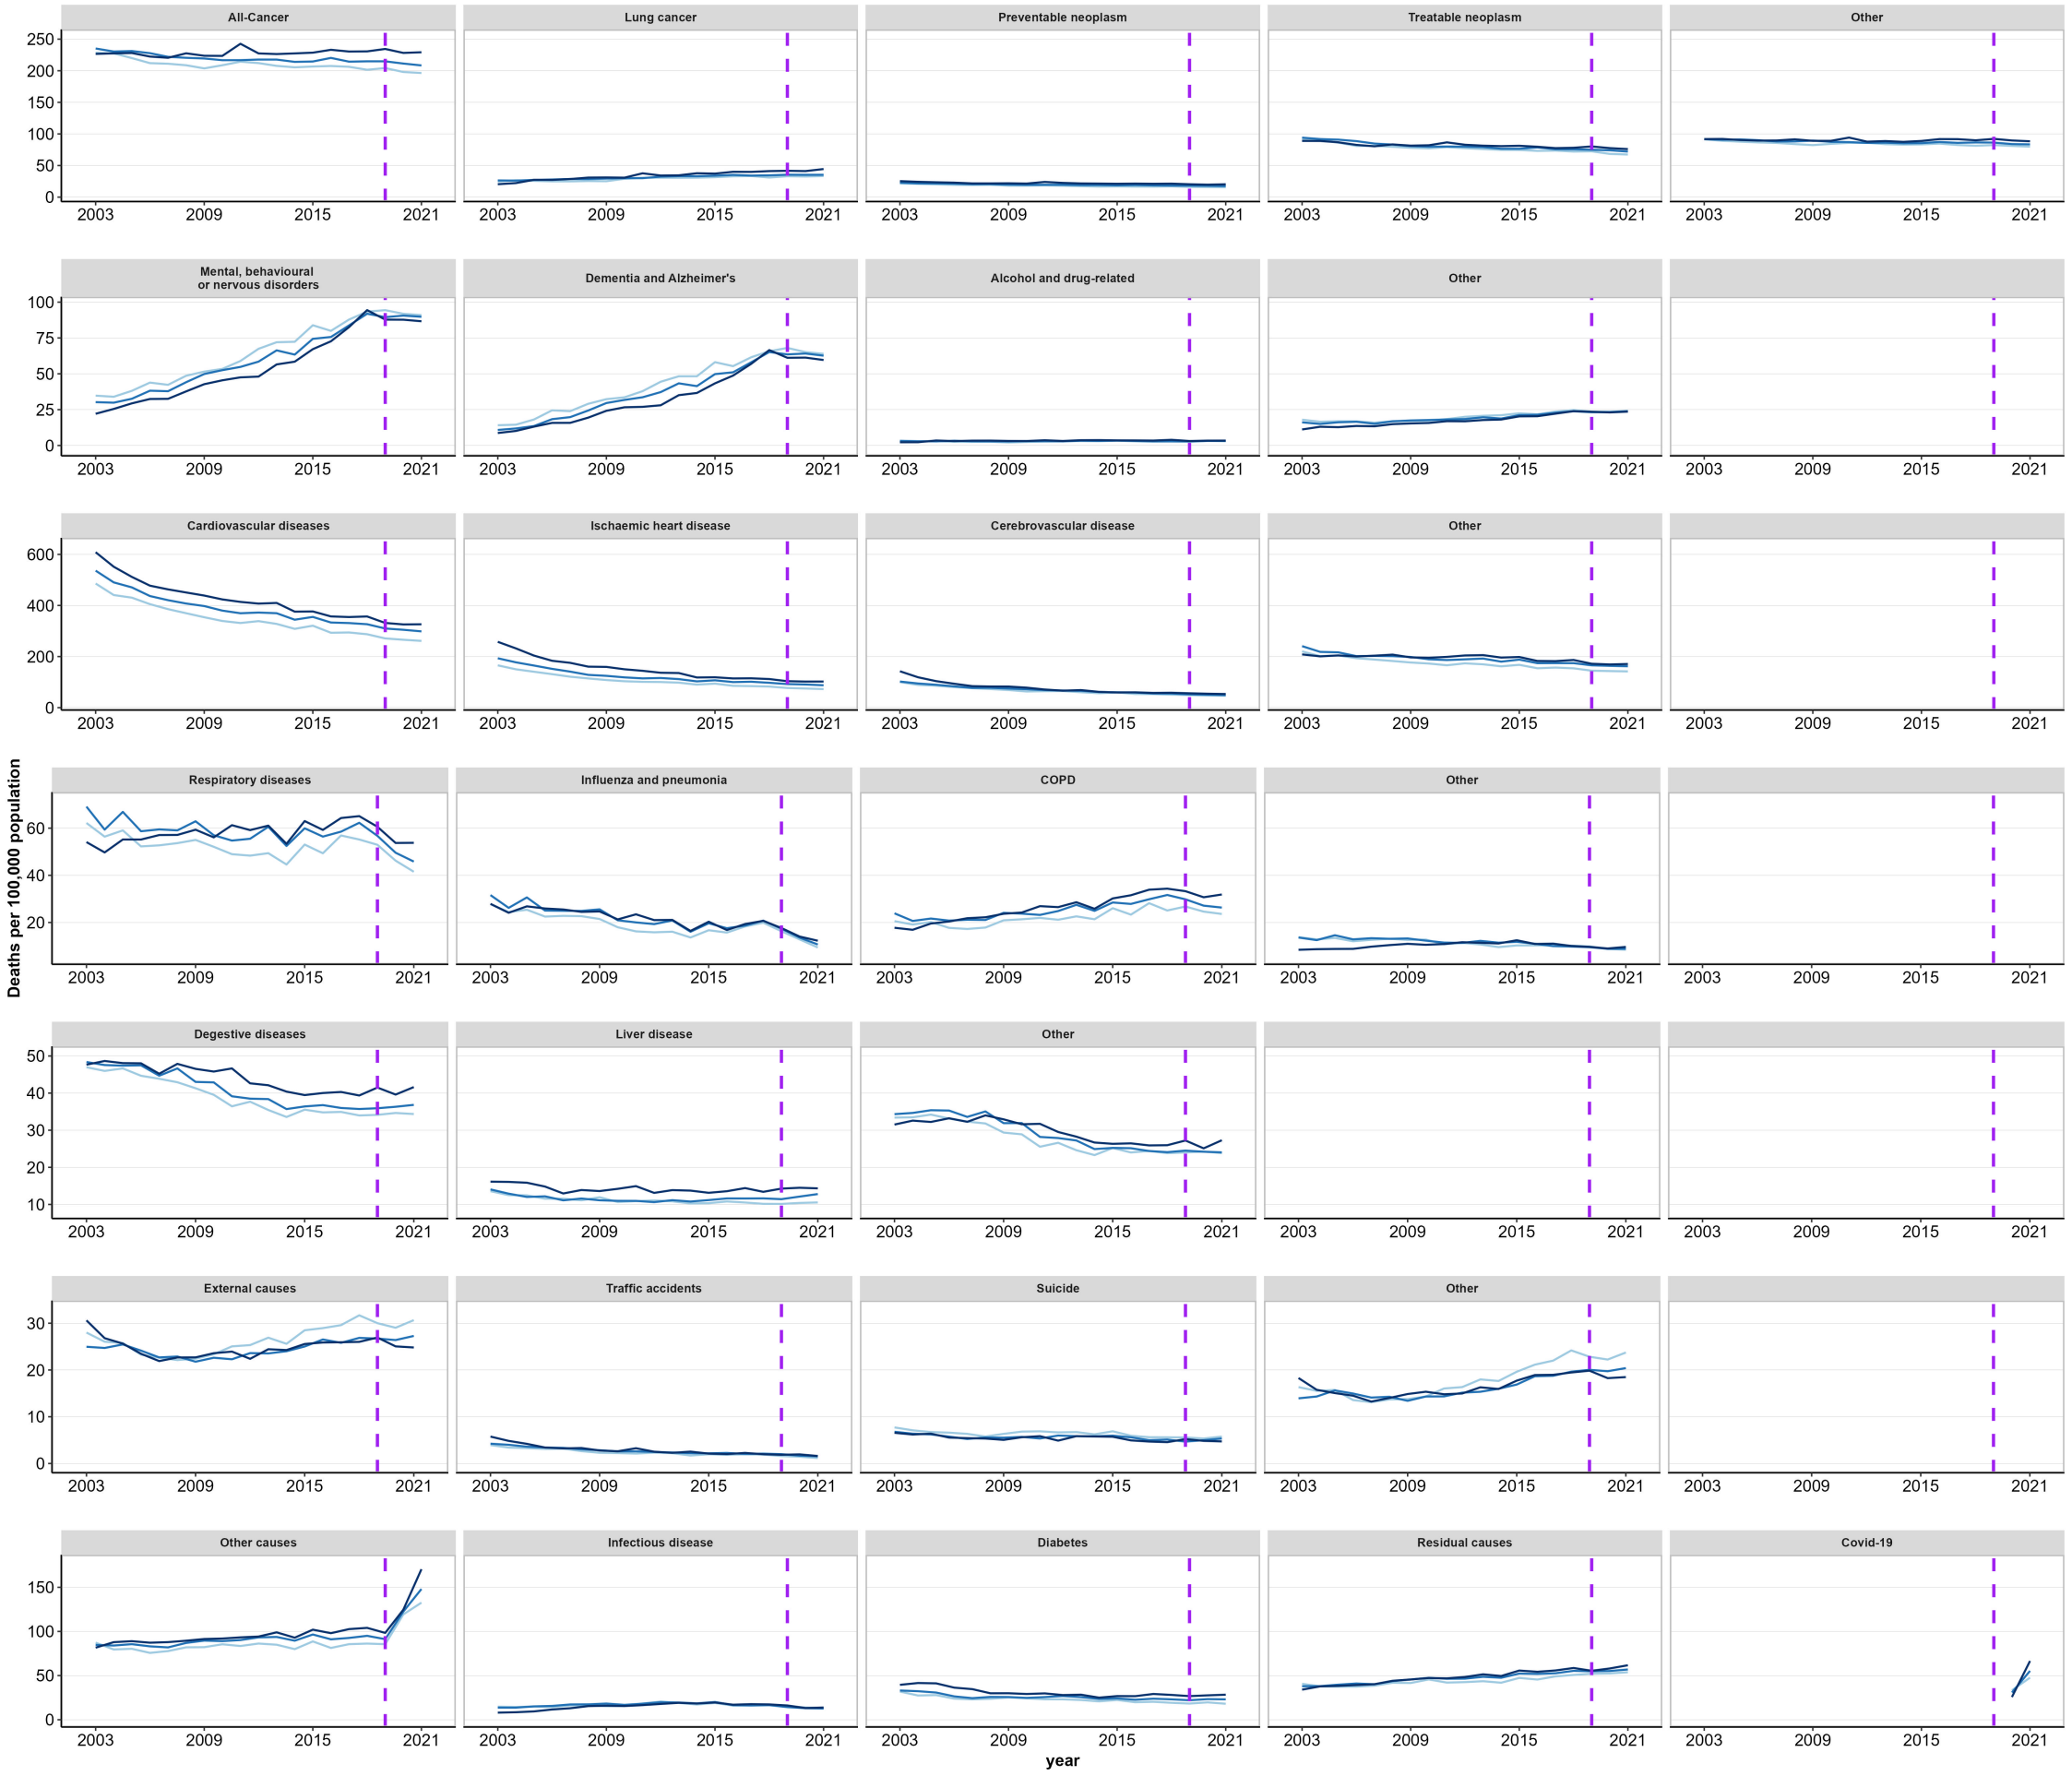

Socioeconomic deprivation (GSD) — low (quintile 1) — middle (quintiles 2-4) — high (quintile 5)



**Fig. S4 Cause of death contribution to the development of life expectancy between 2003 and 2019 in least and most deprived quintile of area-based socioeconomic deprivation by sex**

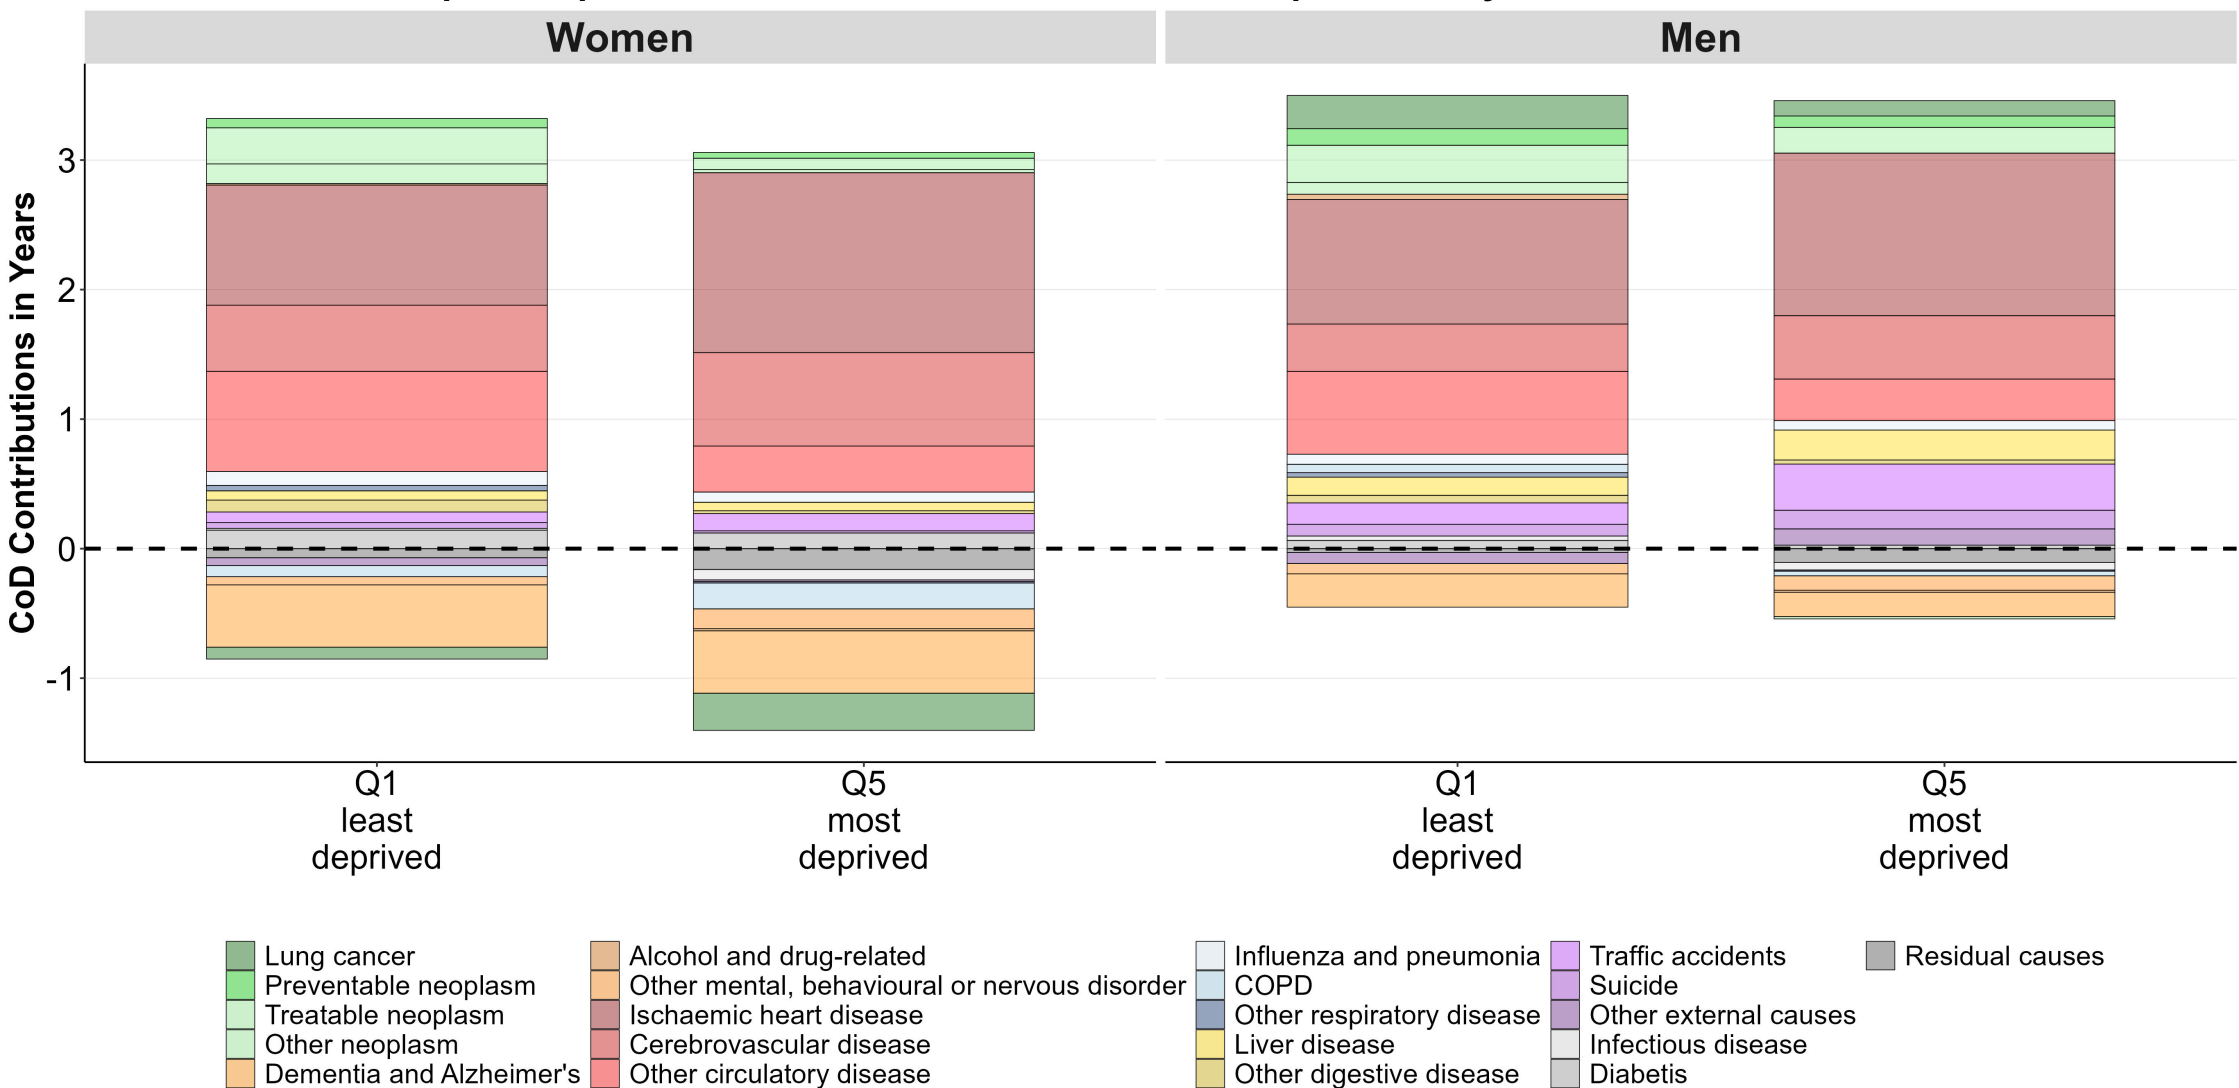

Fig.S5 Age contributions to the gap in life expectancy in men between least and most deprived quintile of area-based socioeconomic deprivation by cause of death in 2003 and 2019

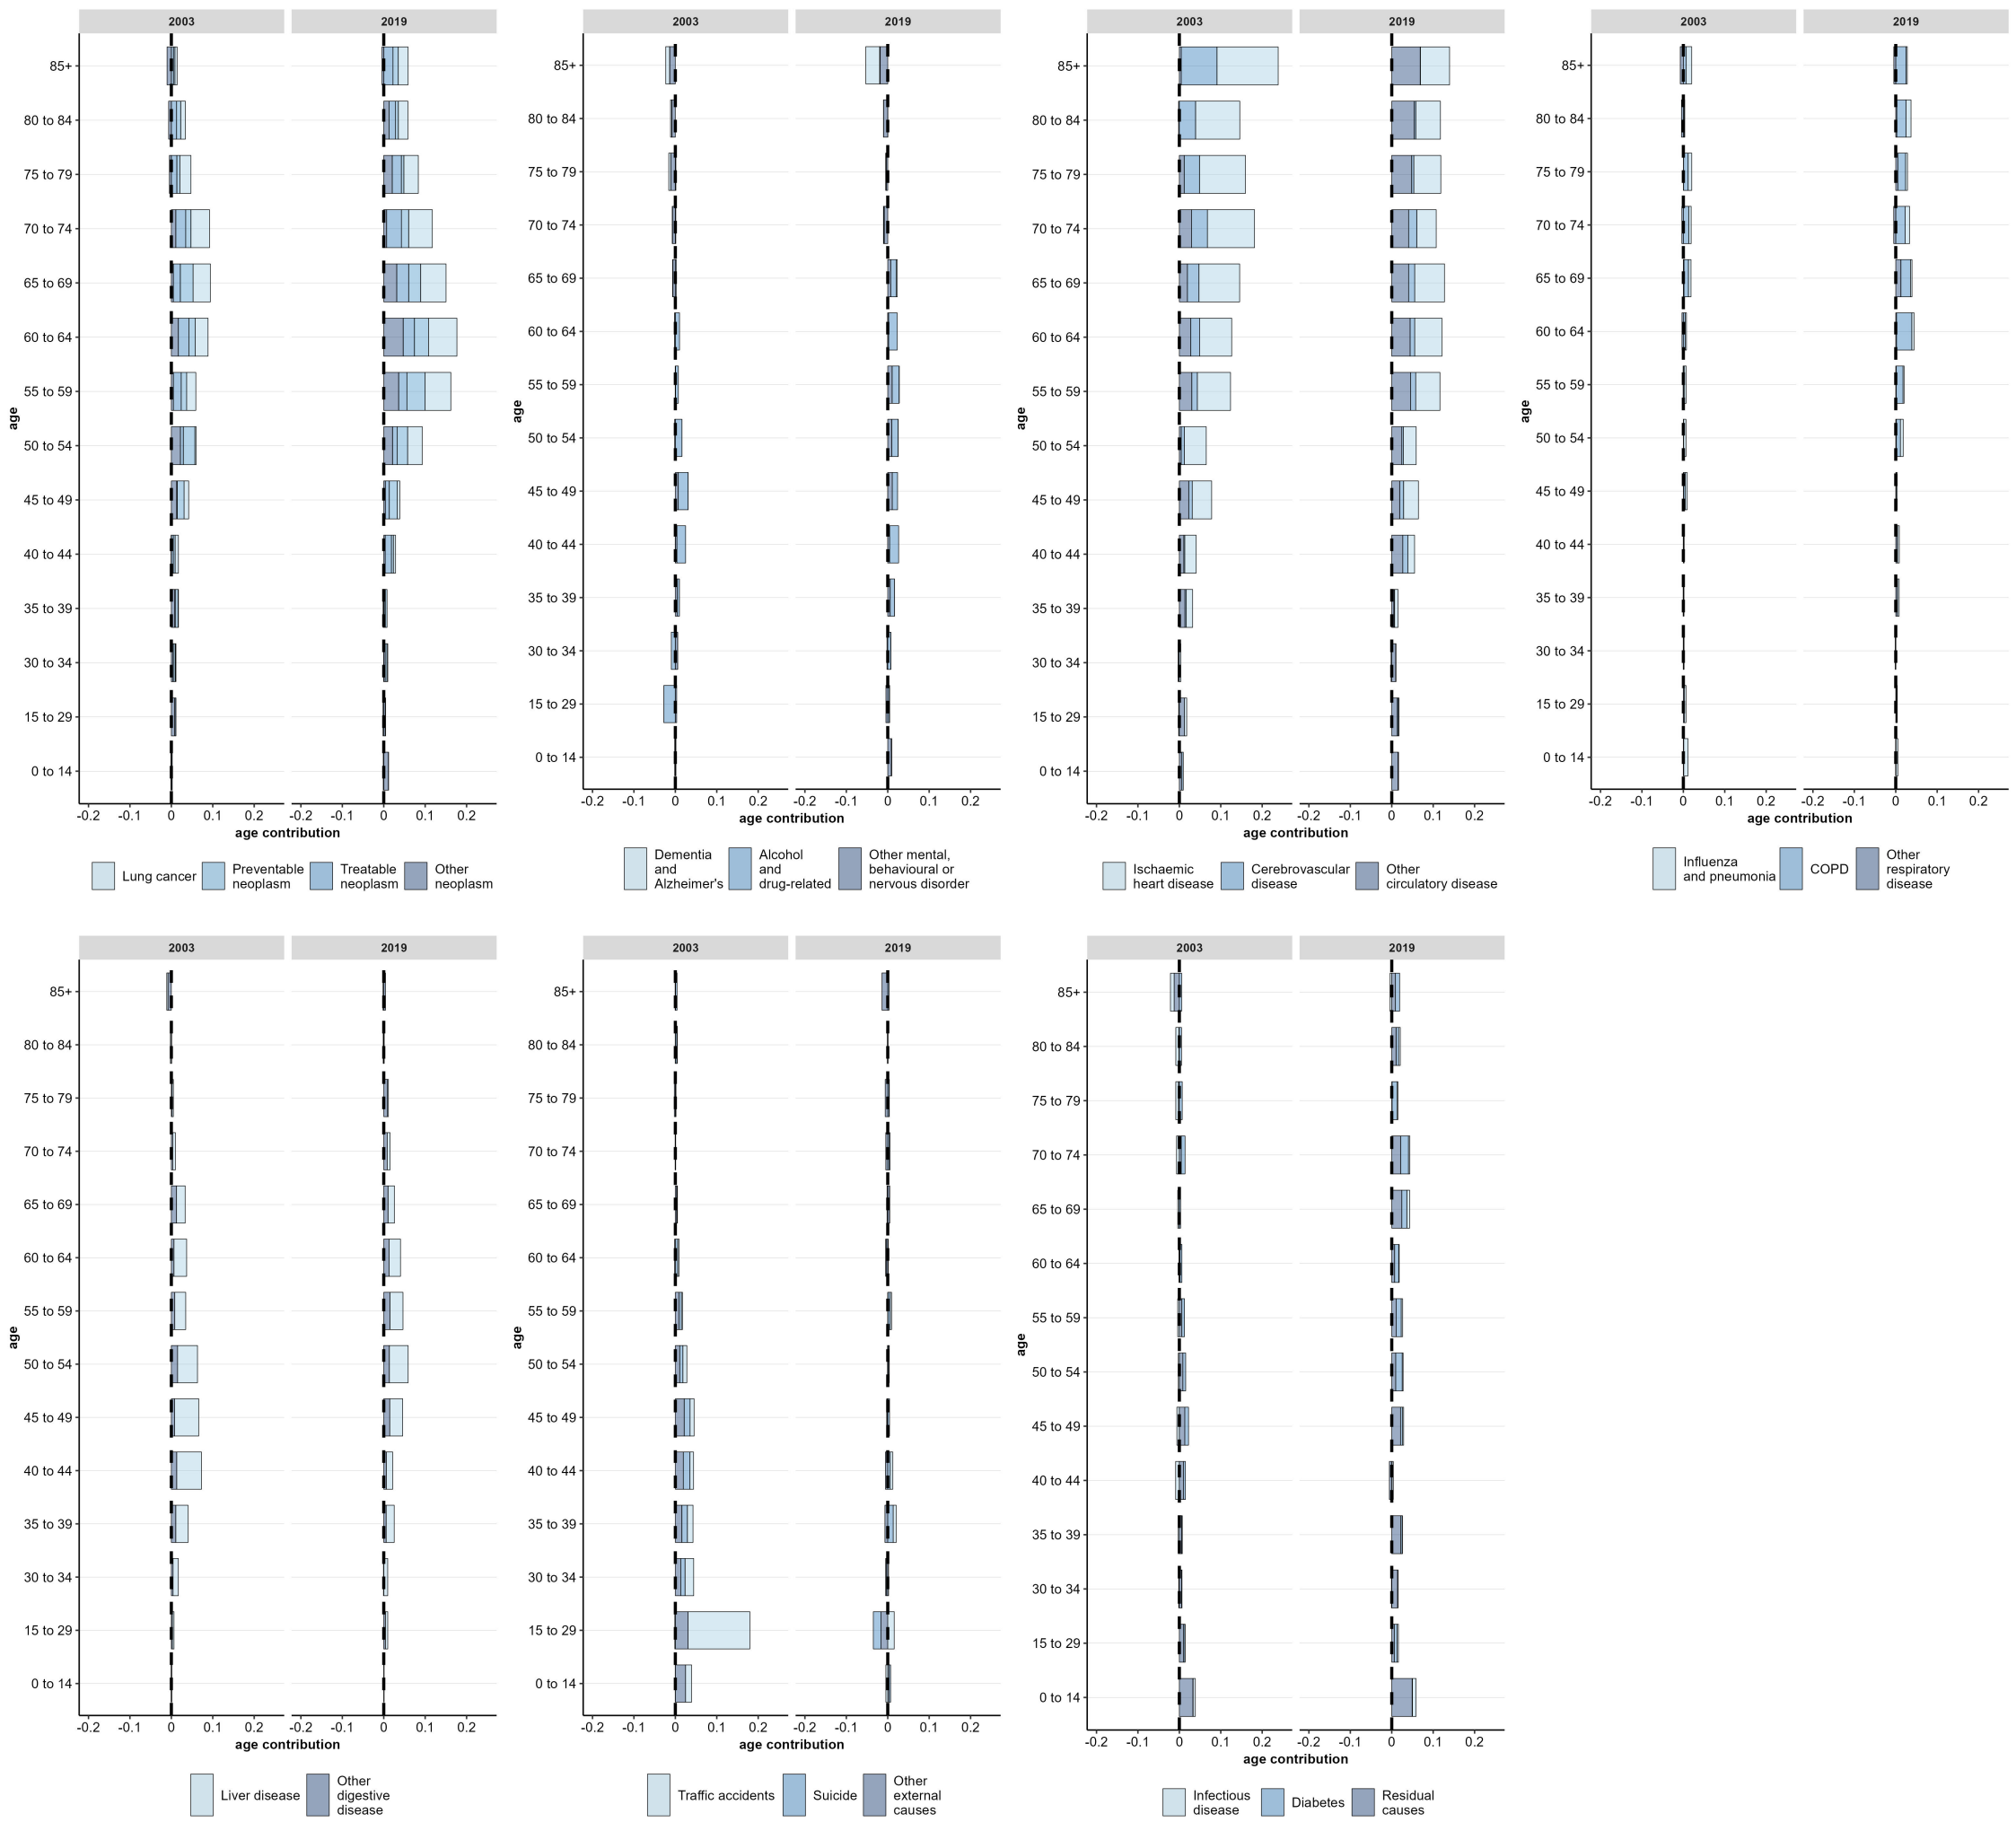

Fig.S6 Age contributions to the gap in life expectancy in women between least and most deprived quintile of area-based socioeconomic deprivation by cause of death in 2003 and 2019

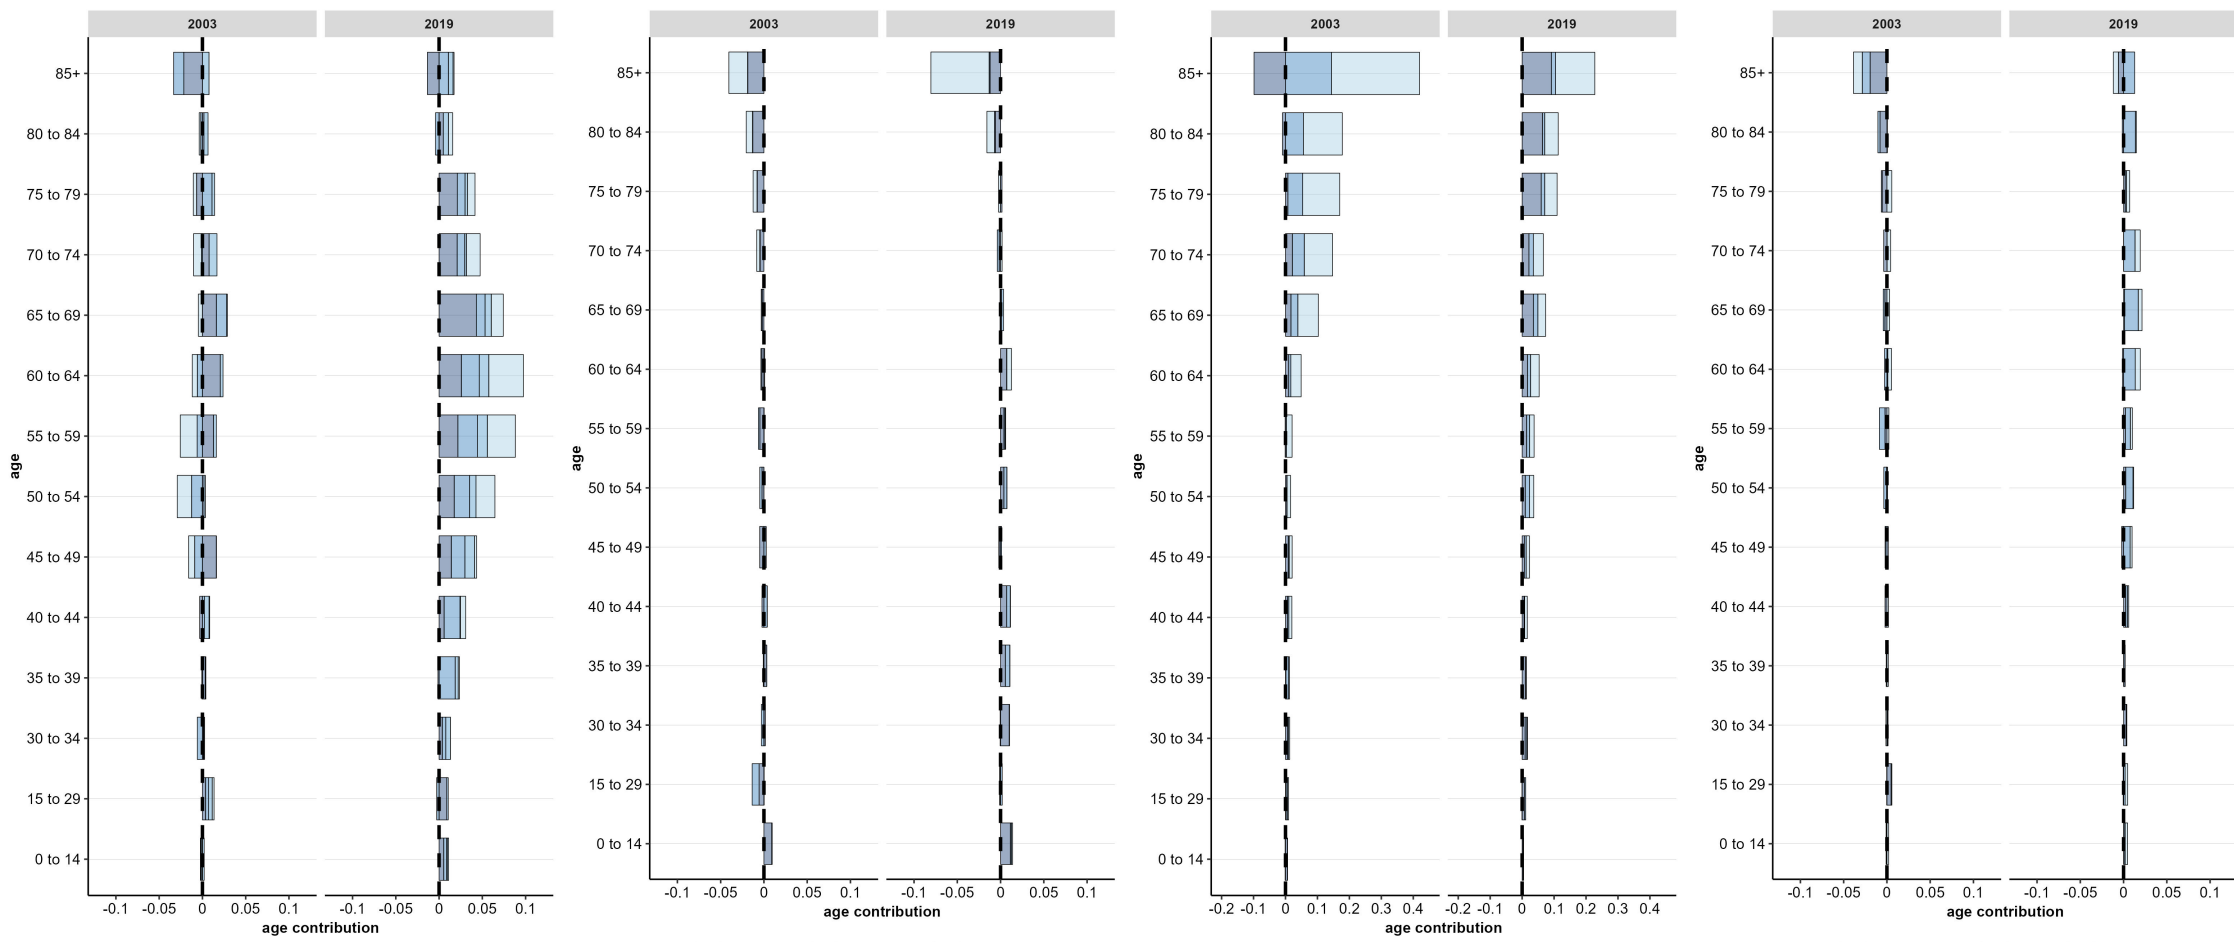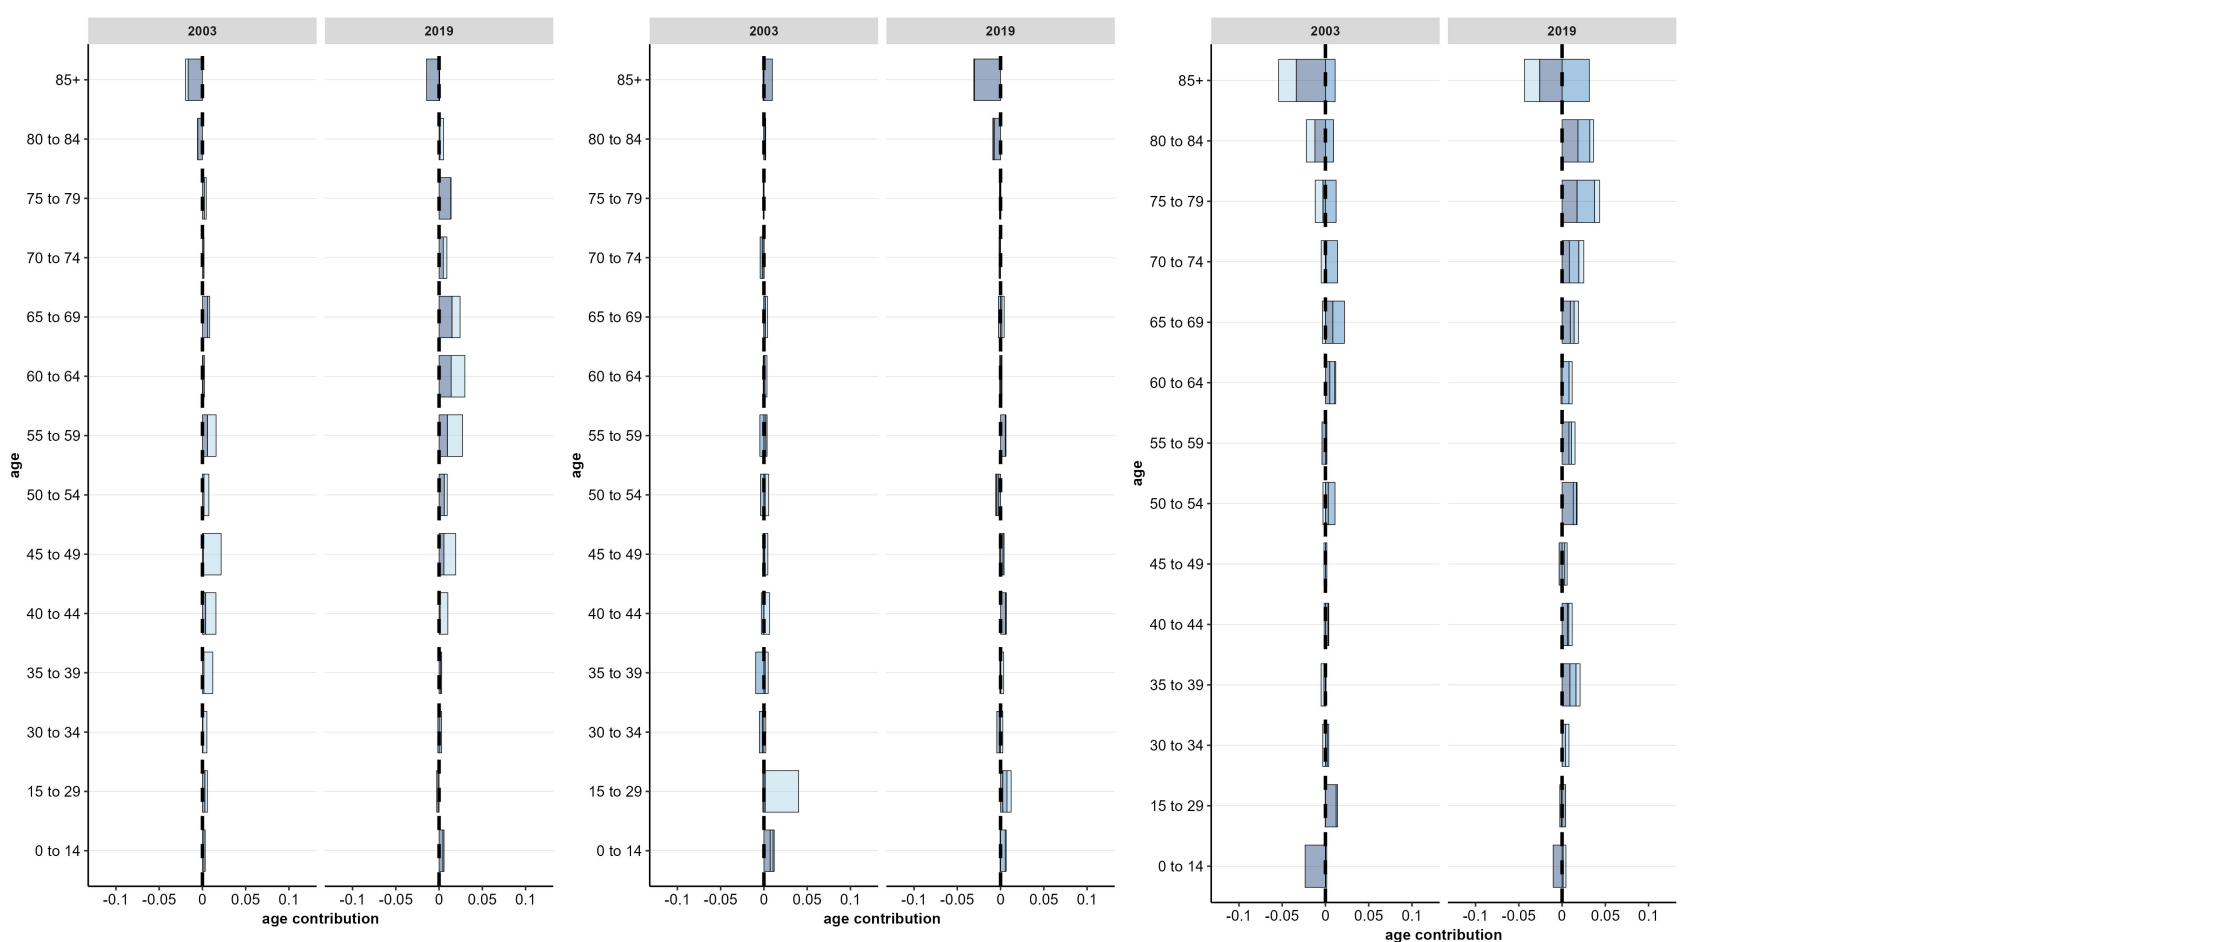

Supplement: Supplementary file [file media-1.pdf]
